# Supplementary material
Source: Springer Nature journal article supplement (https://www.springermedizin.de/resource/supplementary/13058_2012_3052_MOESM6_ESM.pdf/9703162)

### MCF-10A

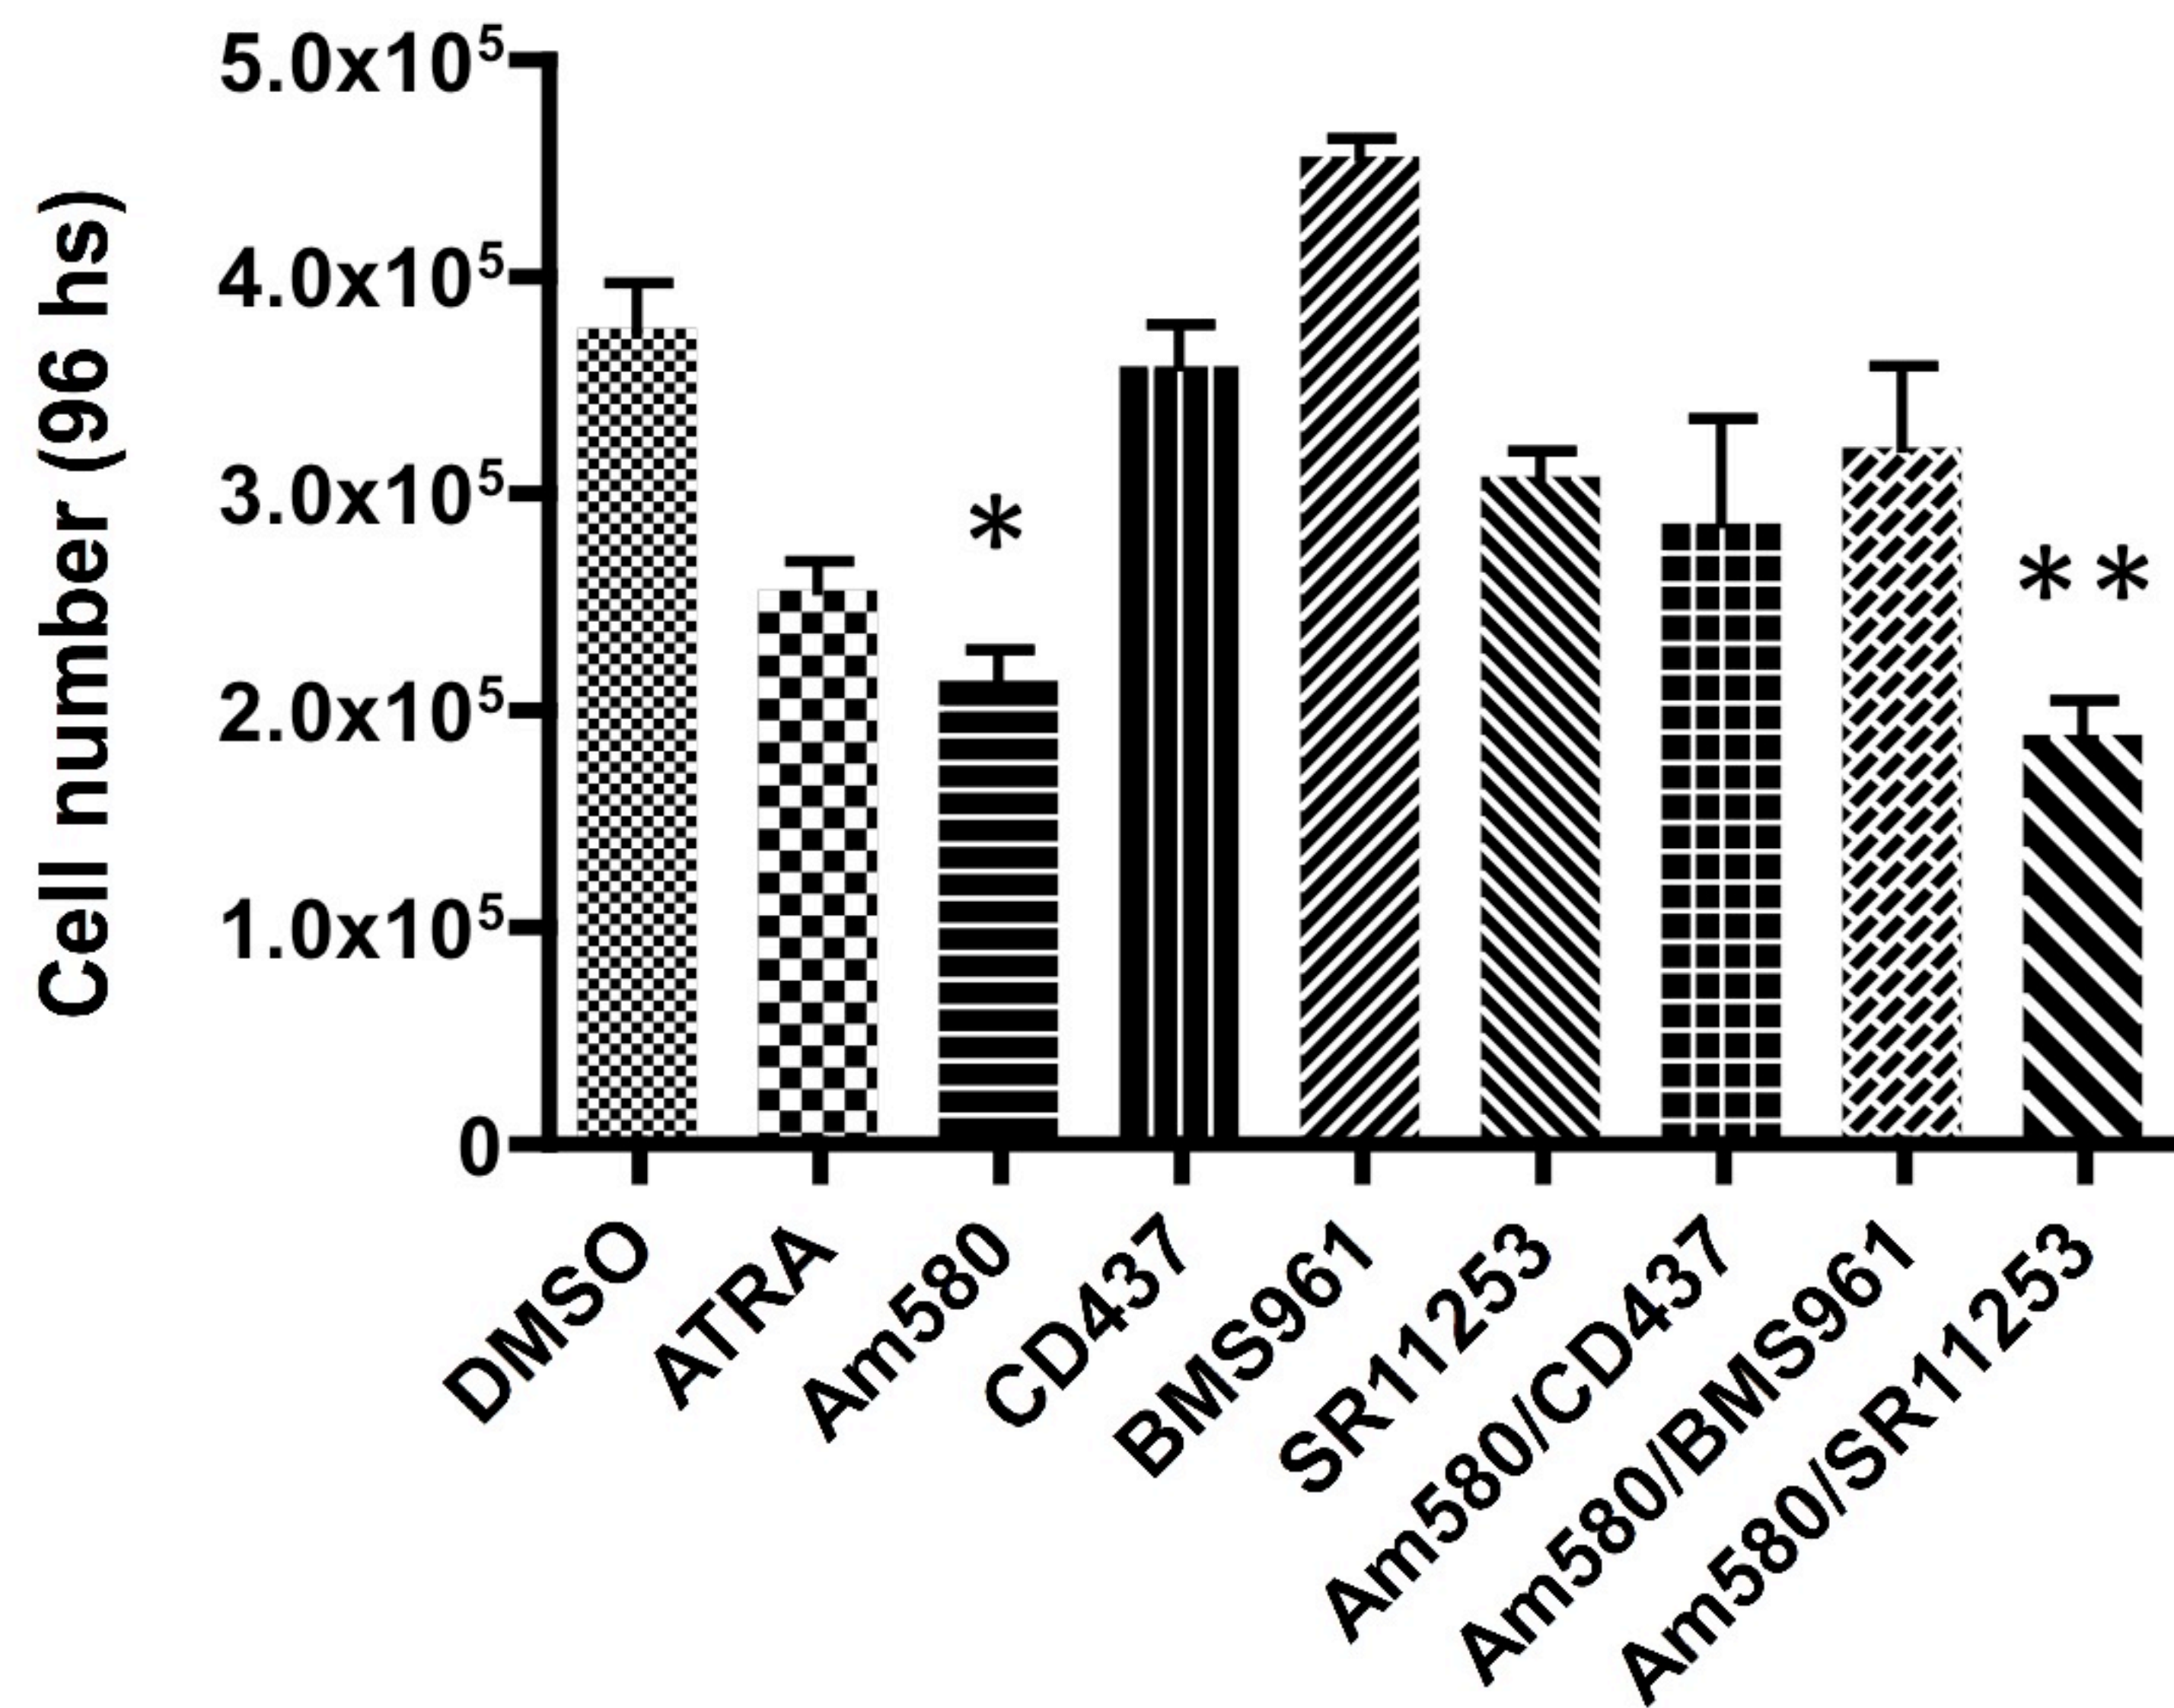

ANOVA \*p<0.01; \*\*p<0.001

### MCF-7

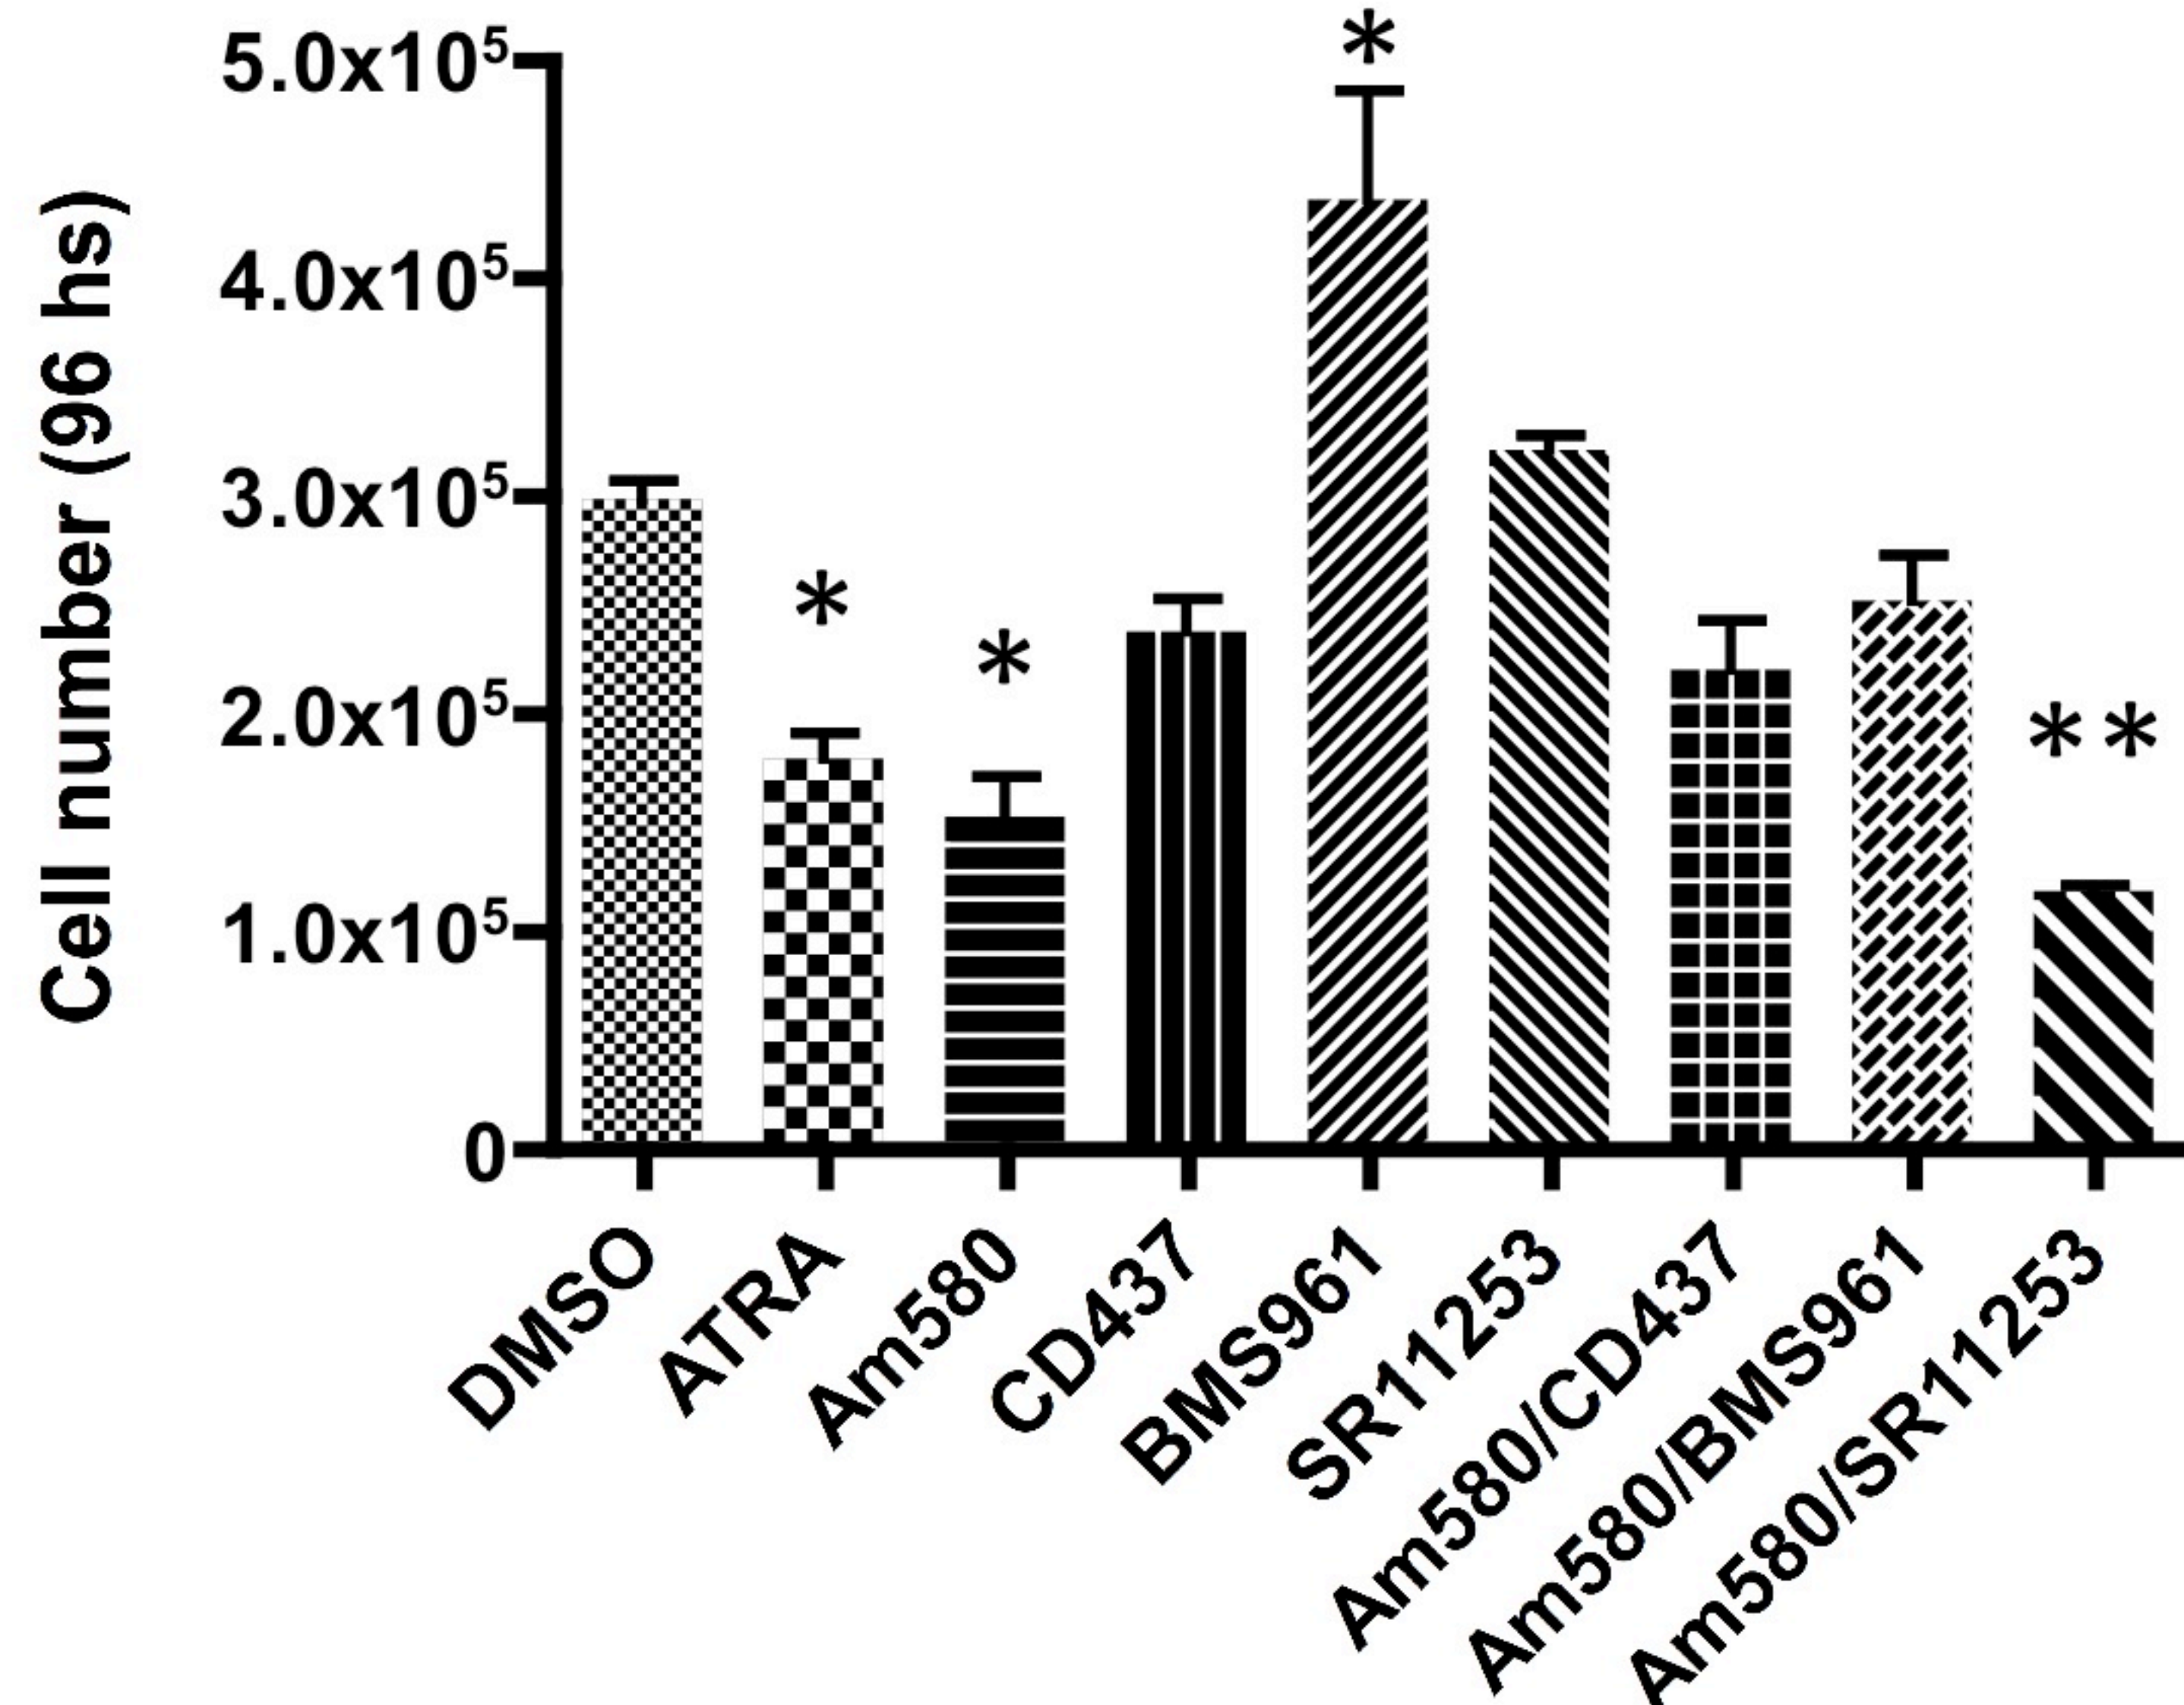

ANOVA \*p<0.01; \*\*p<0.001

### MDA-MB-231

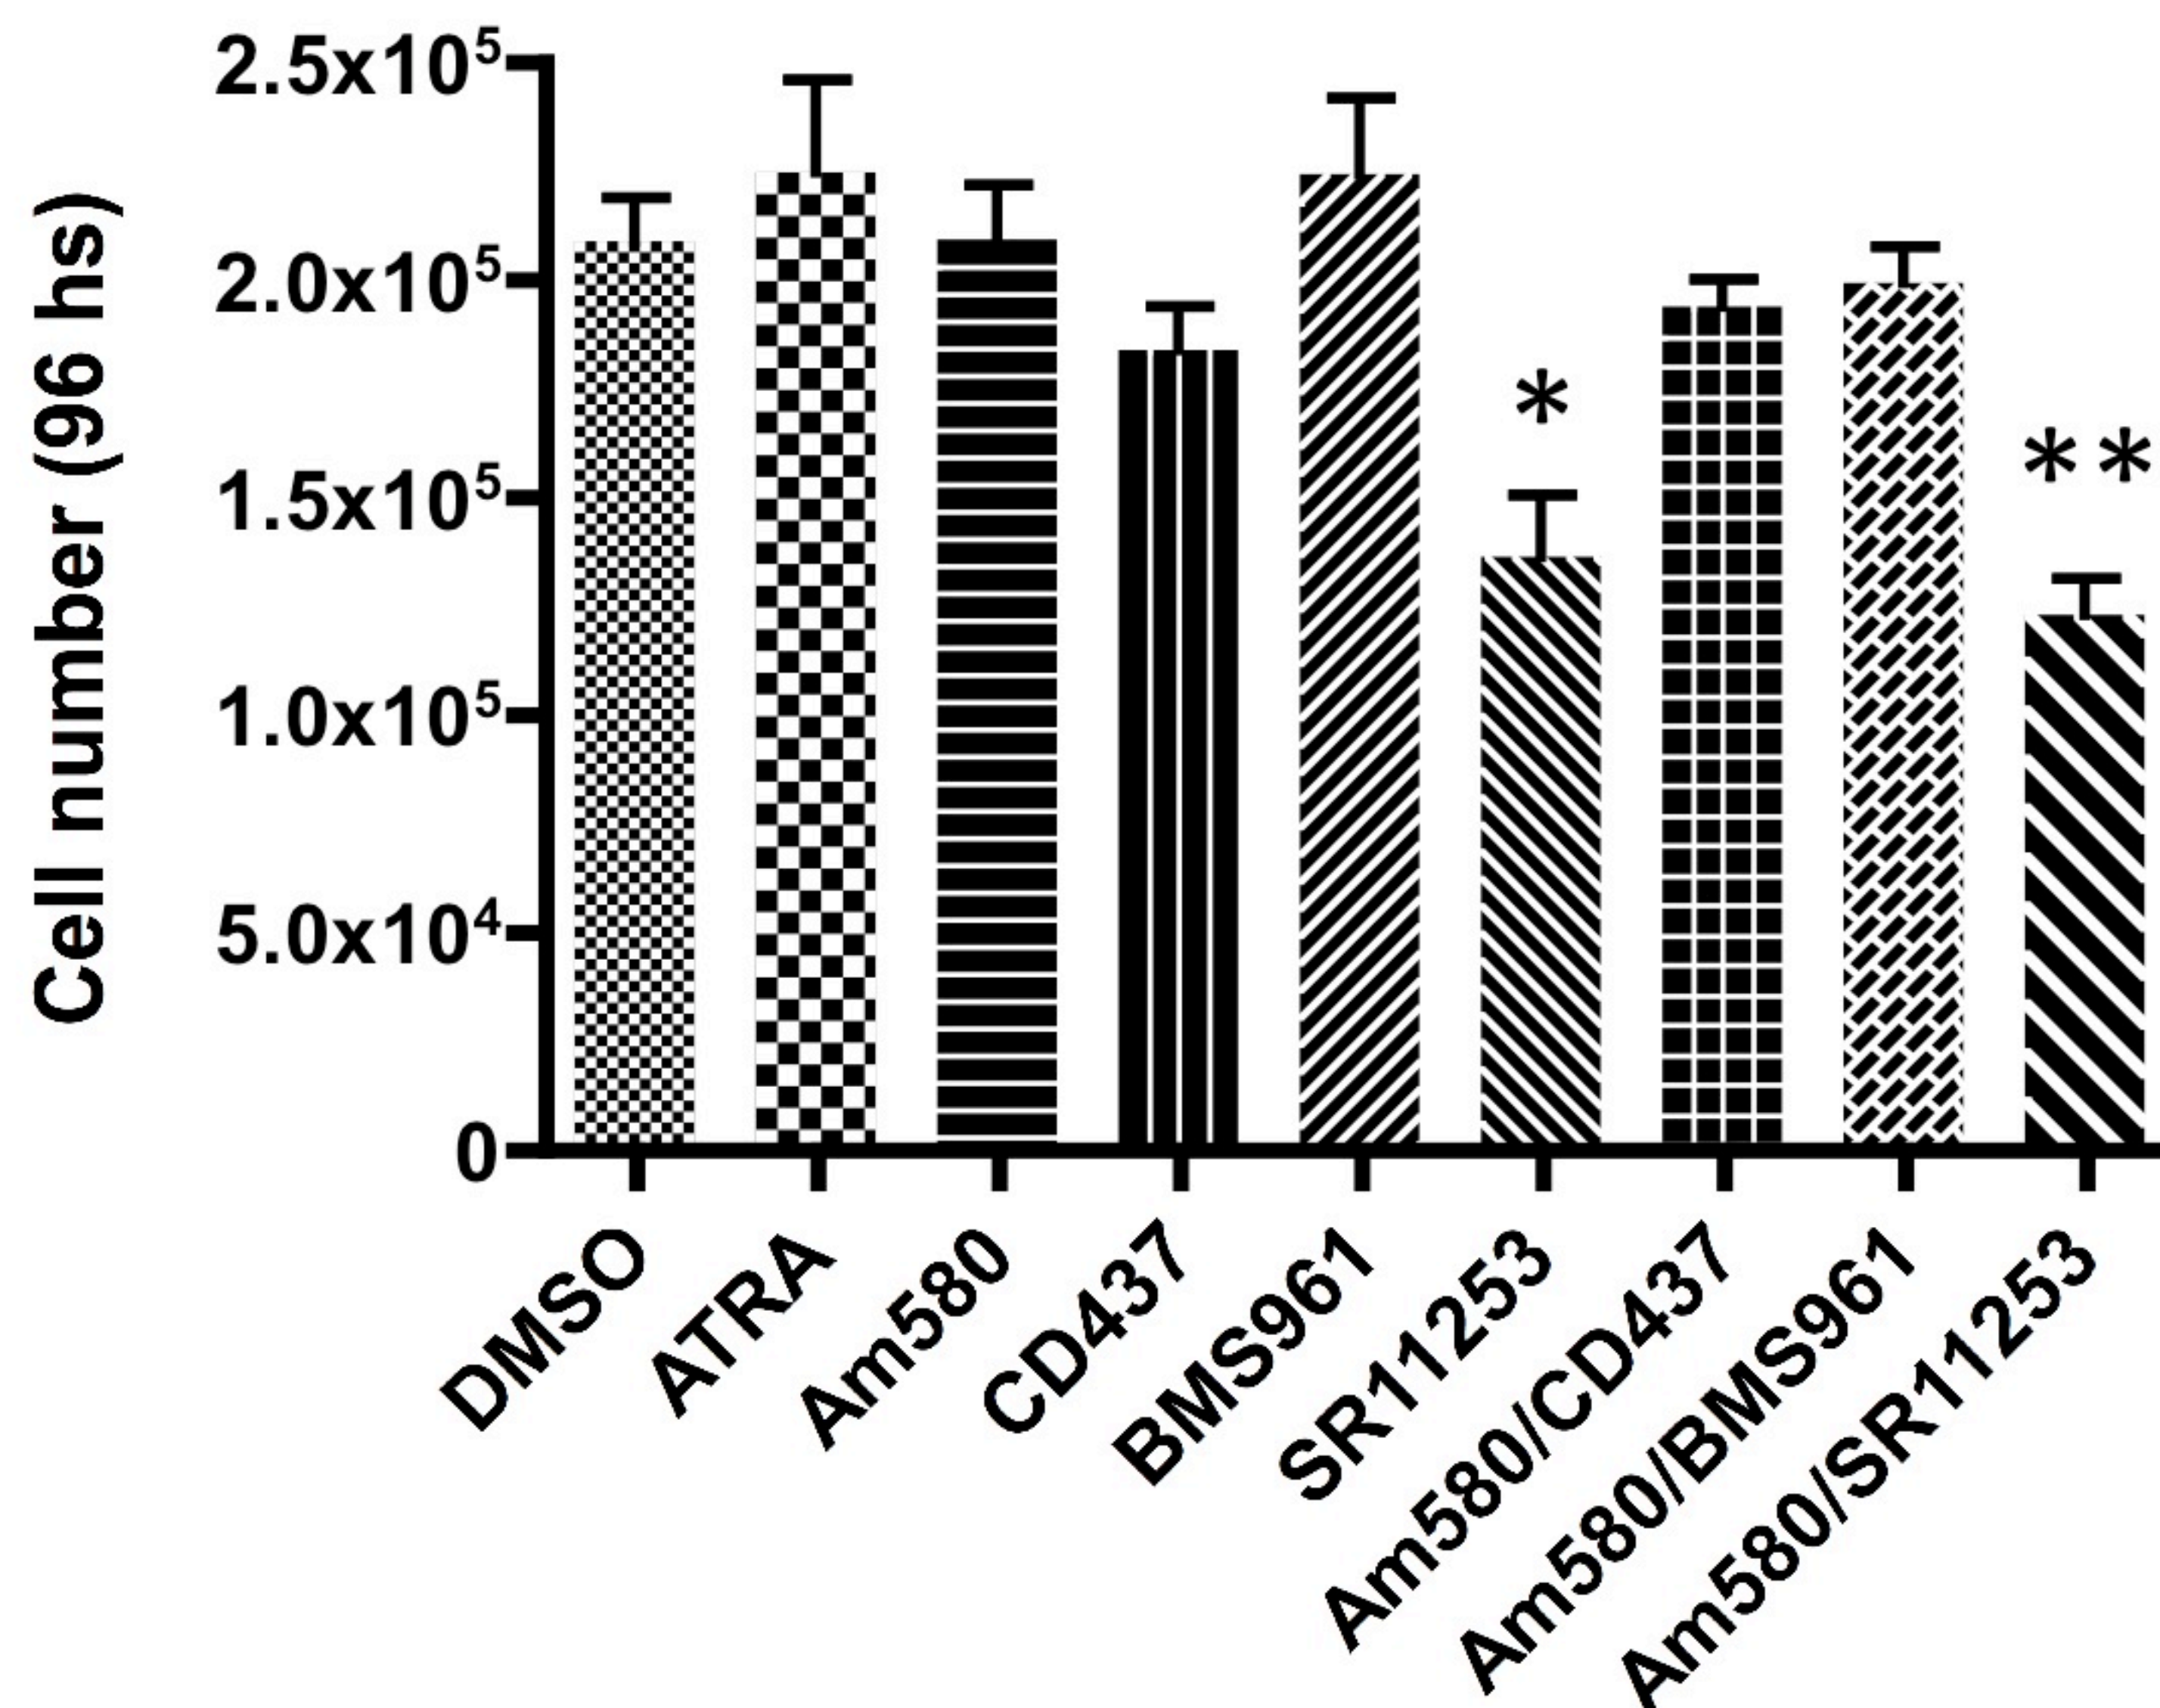

ANOVA \*p<0.05; \*\*p<0.01

### Myc

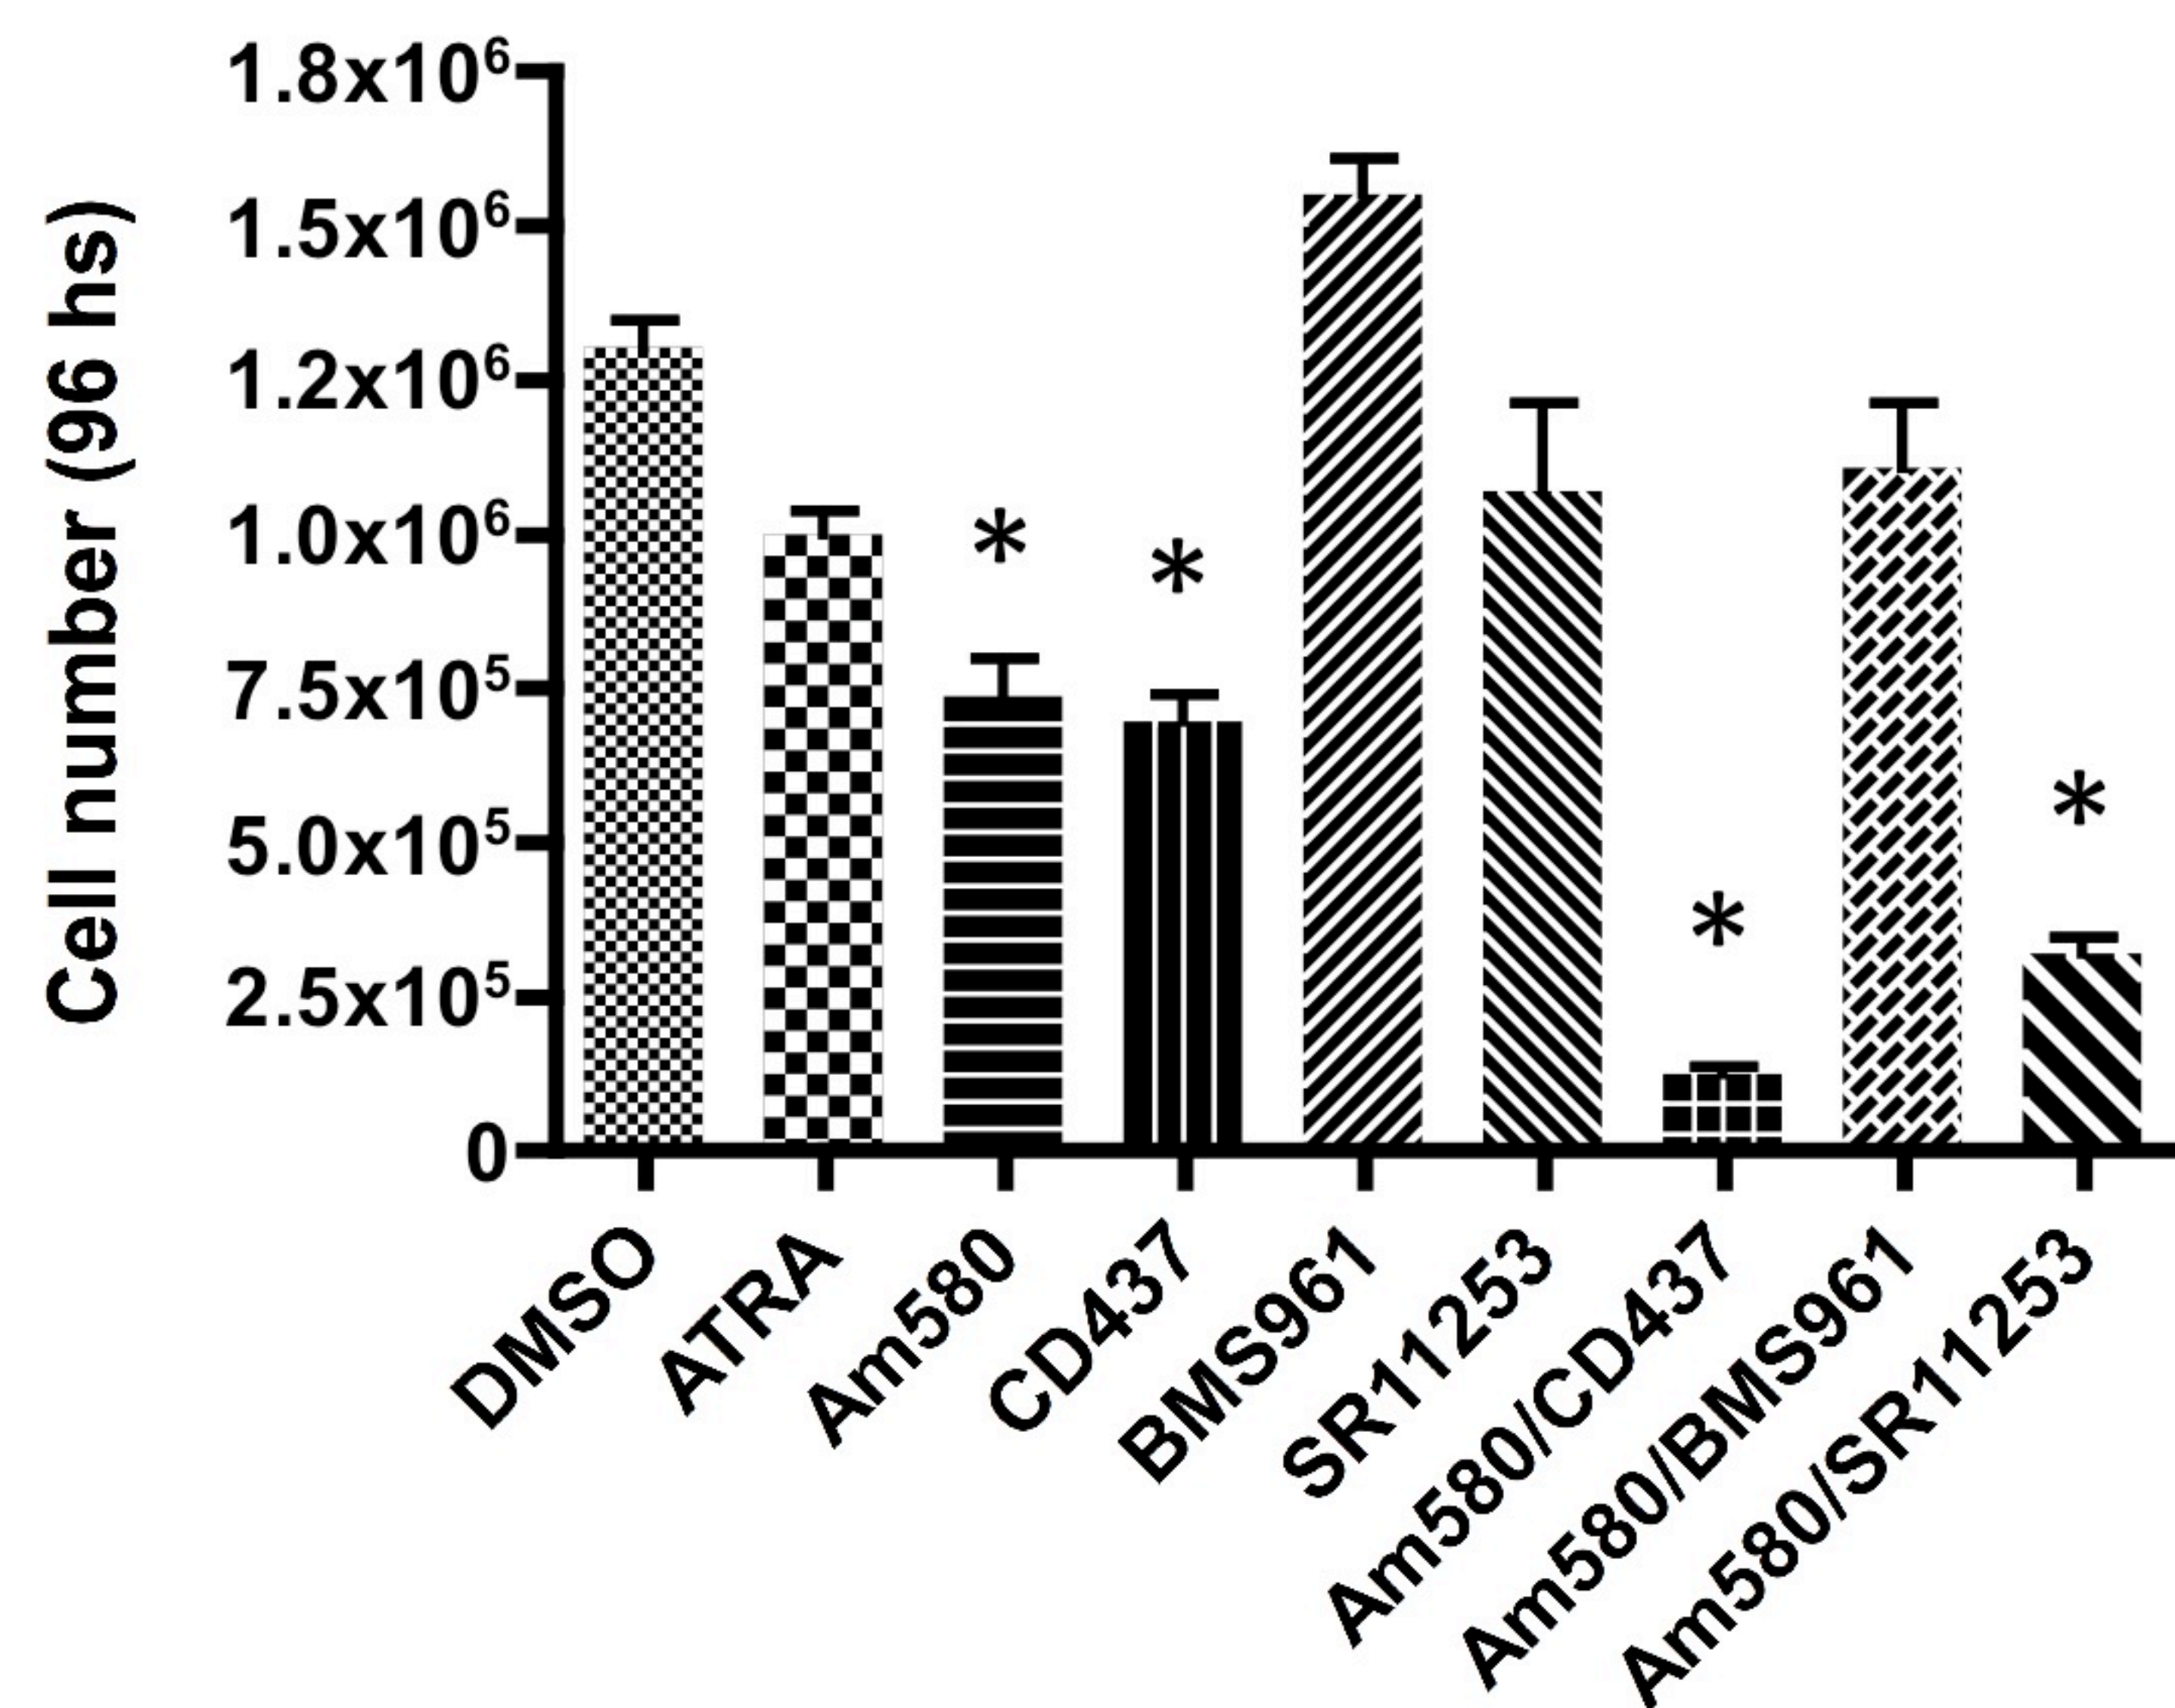

ANOVA \*p<0.001

Supplement: MOESM6 [file 9703162]
